# Supplementary material for: Anti‐HMGB1 Monoclonal Antibody Ameliorates Immunosuppression after Peripheral Tissue Trauma: Attenuated T‐Lymphocyte Response and Increased Splenic CD11b+Gr‐1+ Myeloid‐Derived Suppressor Cells Require HMGB1
Source: Hindawi journal article supplement (doi:10.1155/2015/458626), 2015-01-01
Supplement: f1 [file 458626.f1.pdf]

# Supplementary Figure 1

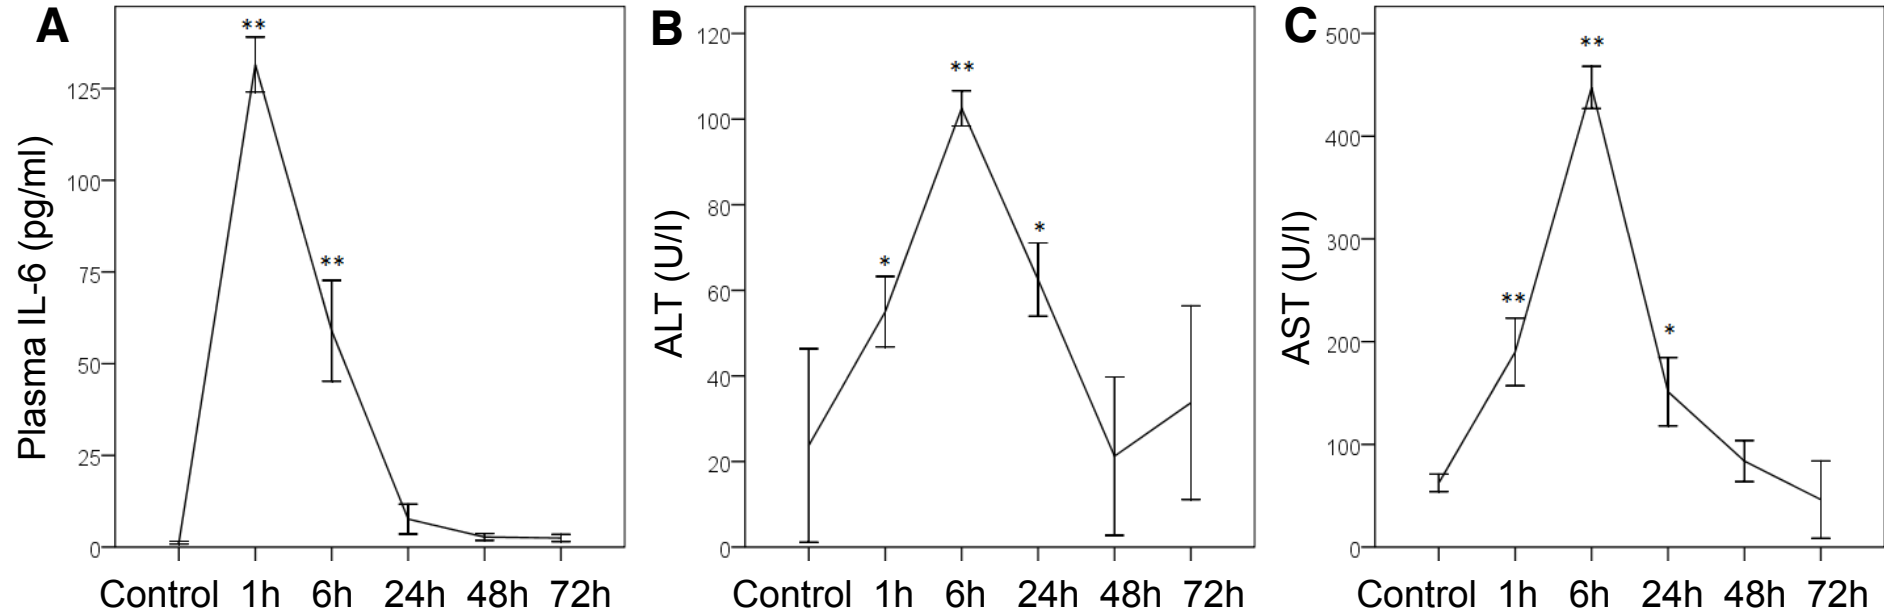

# Supplementary Figure 2

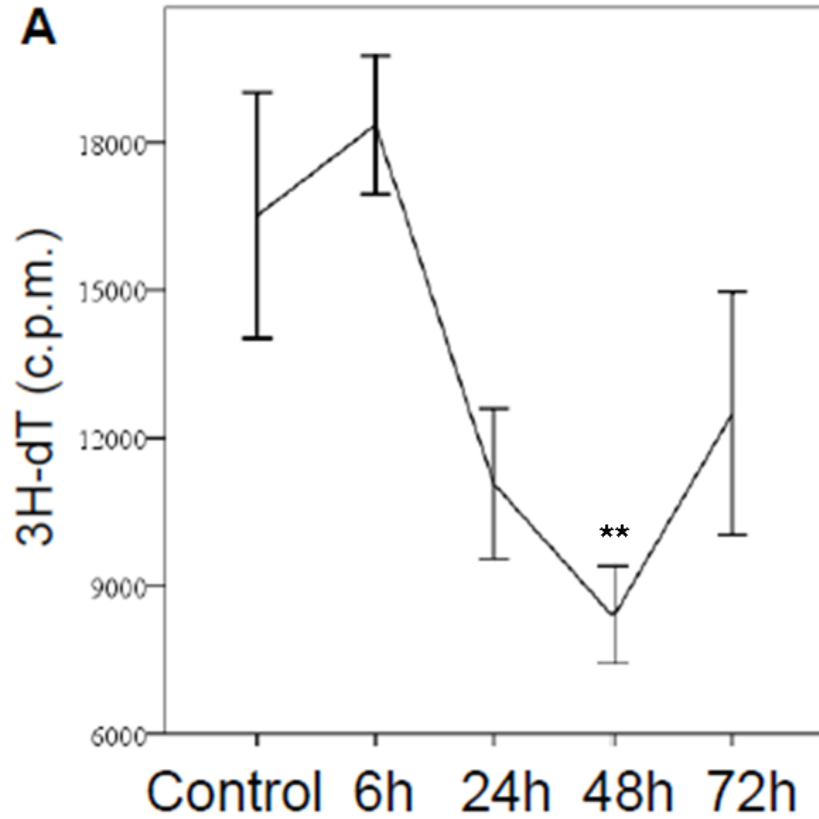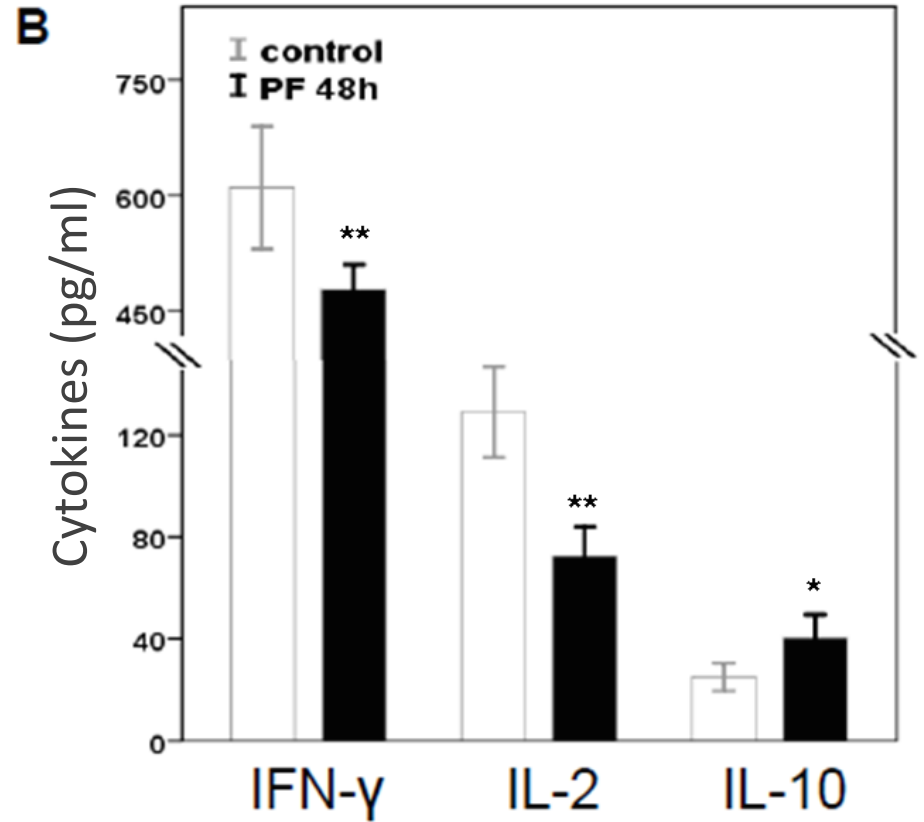

Supplementary Table 1:

Plasma HMGB1 levels peak at 24h after Pseudofracture (PF) injury, measured by HMGB1 ELISA (IBL Int.Corp, Toronto, Canada).

Data shown as Mean  $\pm$  SEM. (n=2 animals/group)

| <b>Group:</b>  | <b>Control</b> | <b>1h PF</b> | <b>6h PF</b> | <b>24h PF</b> | <b>48h PF</b> |
|----------------|----------------|--------------|--------------|---------------|---------------|
| <b>Plasma</b>  | 15.795         | 17.2785      | 8.198        | 31.9395       | 13.7895       |
| <b>HMGB1</b>   | $\pm$          | $\pm$        | $\pm$        | $\pm$         | $\pm$         |
| <b>(ng/ml)</b> | 5.34           | 1.58         | 2.73         | 18.40         | 1.13          |

Supplementary Table 2:

Plasma HMGB1 levels peak at 24h after Pseudofracture (PF) injury. Analysis of Area values complementary to Western blot in Figure 2 using ImageJ software (U. S. National Institutes of Health, Bethesda, Maryland, USA). Data = Mean  $\pm$  SEM. (n=2 Western blot wells/group)

| <b>Group</b>                          | <b>Control<br/>= 0h</b> | <b>1h PF</b>         | <b>6h PF</b>        | <b>24h PF</b>          | <b>48h PF</b>          | <b>+<br/>(positive)</b> |
|---------------------------------------|-------------------------|----------------------|---------------------|------------------------|------------------------|-------------------------|
| <b>Western<br/>blot wells</b>         | (1, 2)                  | (3, 4)               | (5, 6)              | (7, 8)                 | (9, 10)                | (11, 12)                |
| <b>Area<br/>(arbitrary<br/>units)</b> | 65<br>$\pm$<br>45.9     | 200<br>$\pm$<br>57.9 | 214<br>$\pm$<br>9.8 | 408.5<br>$\pm$<br>27.9 | 106.5<br>$\pm$<br>65.4 | 290.5<br>$\pm$<br>52.7  |
